# Supplementary material for: A versatile color tuning strategy for iridium(III) and platinum(II) electrophosphors by shifting the charge-transfer states with an electron-deficient core
Source: Royal Society of Chemistry journal article supplement (doi:10.1039/b814507e), 2009-01-01
Supplement: b814507e.pdf [file b814507e.pdf]

# **Electronic Supplementary Information**

**for**

**A versatile color tuning strategy for iridium(III) and  
platinum(II) electrophosphors by shifting the  
charge-transfer states with an electron-deficient core**

Gui-Jiang Zhou, Qi Wang, Wai-Yeung Wong,\* Dongge Ma,\* Lixiang Wang and Zhenyang Lin

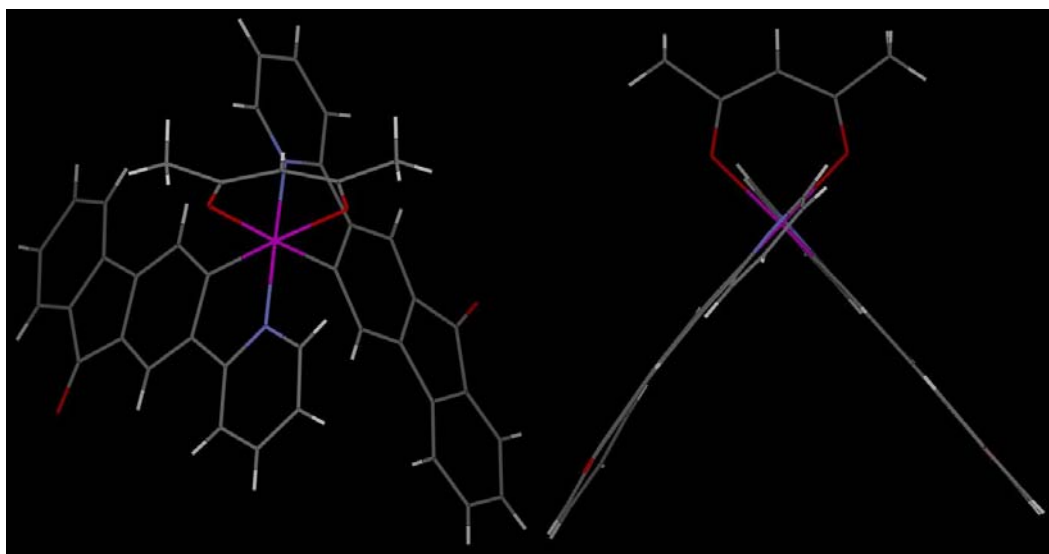

(a) Ir-1

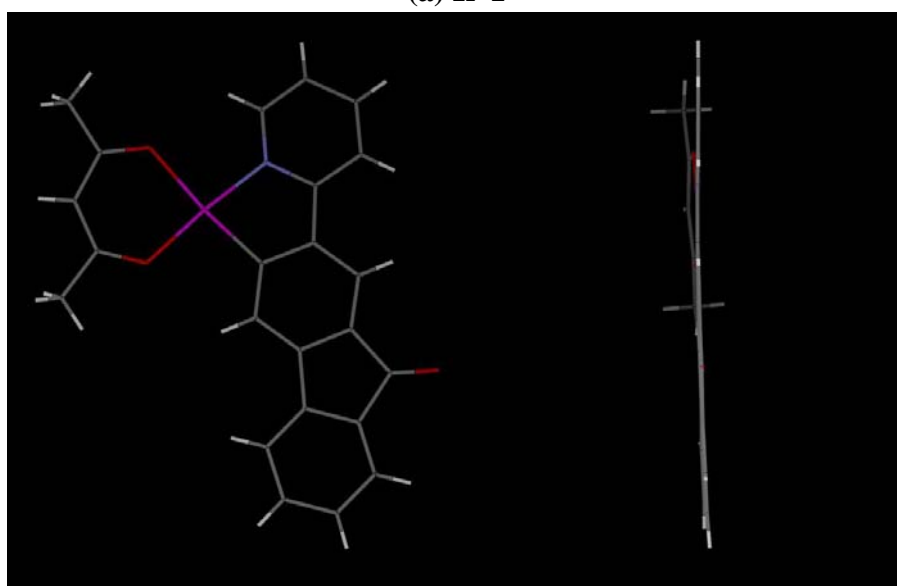

(b) Pt-1

**Fig. S1** X-ray crystal structures of **Ir-1** and **Pt-1** shown in different orientations.

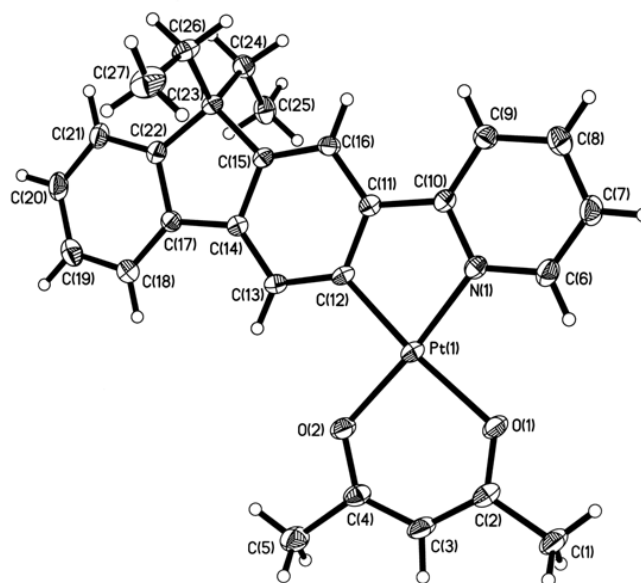

**Fig. S2** ORTEP drawing of the complex **Pt-2** with thermal ellipsoids shown at 25% probability level.

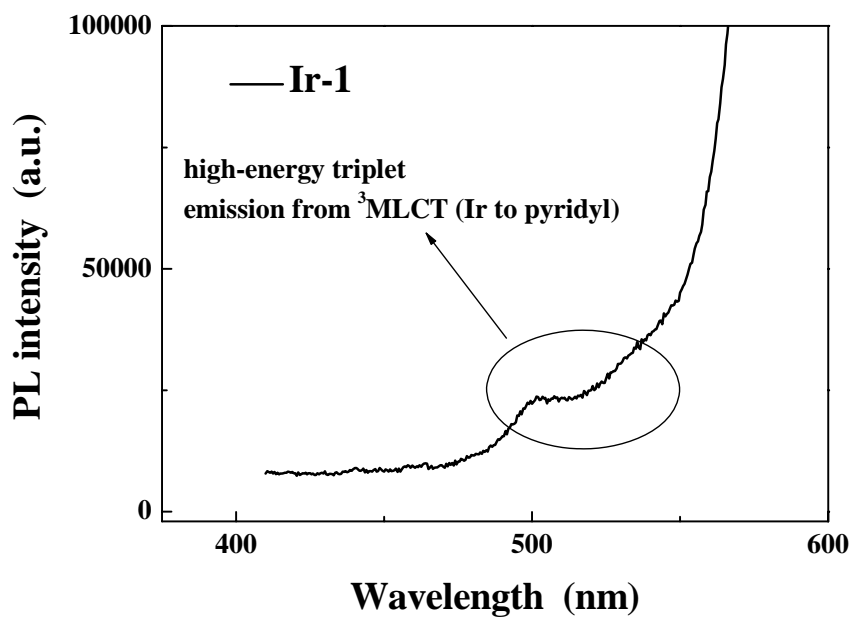

**Fig. S3** An expanded view of the PL spectrum for **Ir-1** in  $\text{CH}_2\text{Cl}_2$  at 293 K.

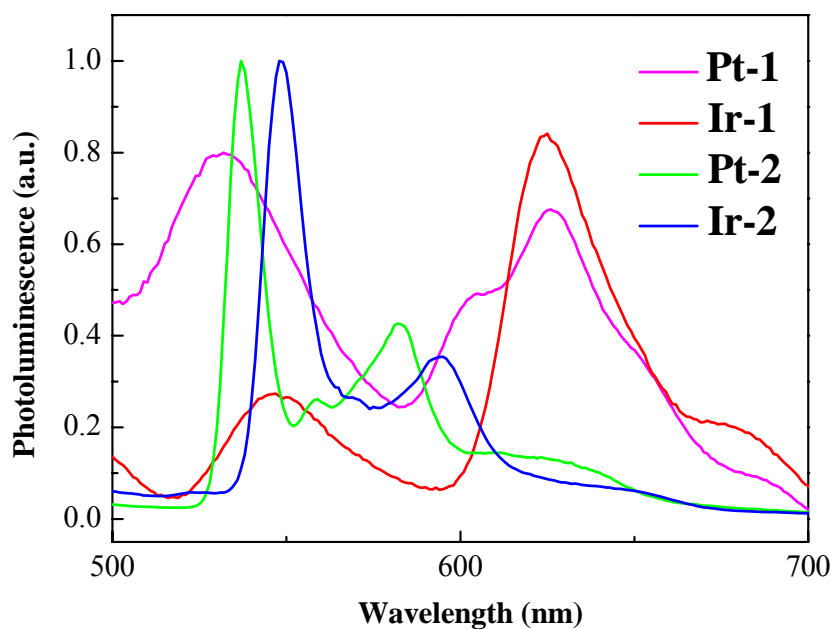

**Fig. S4** PL spectra of the complexes at 77 K.

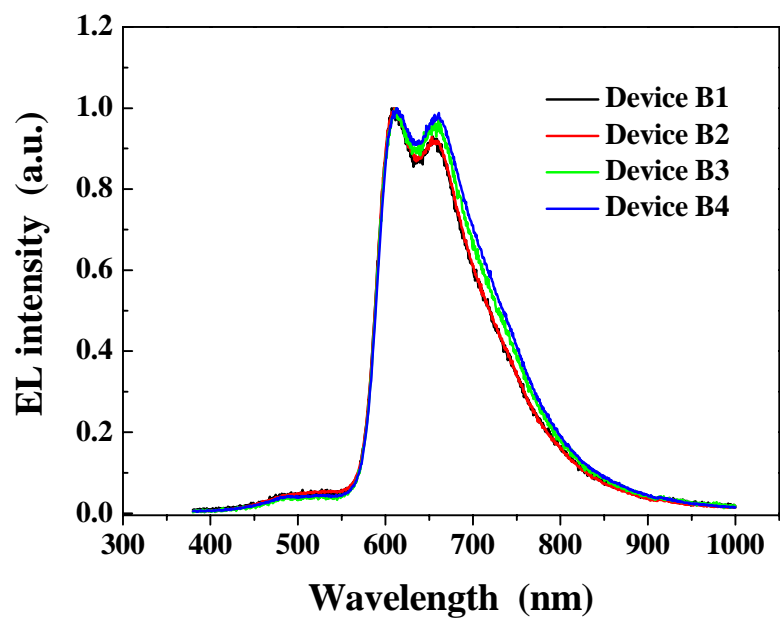

**Fig. S5** EL spectra for the device **B1–B4** at 13 V.

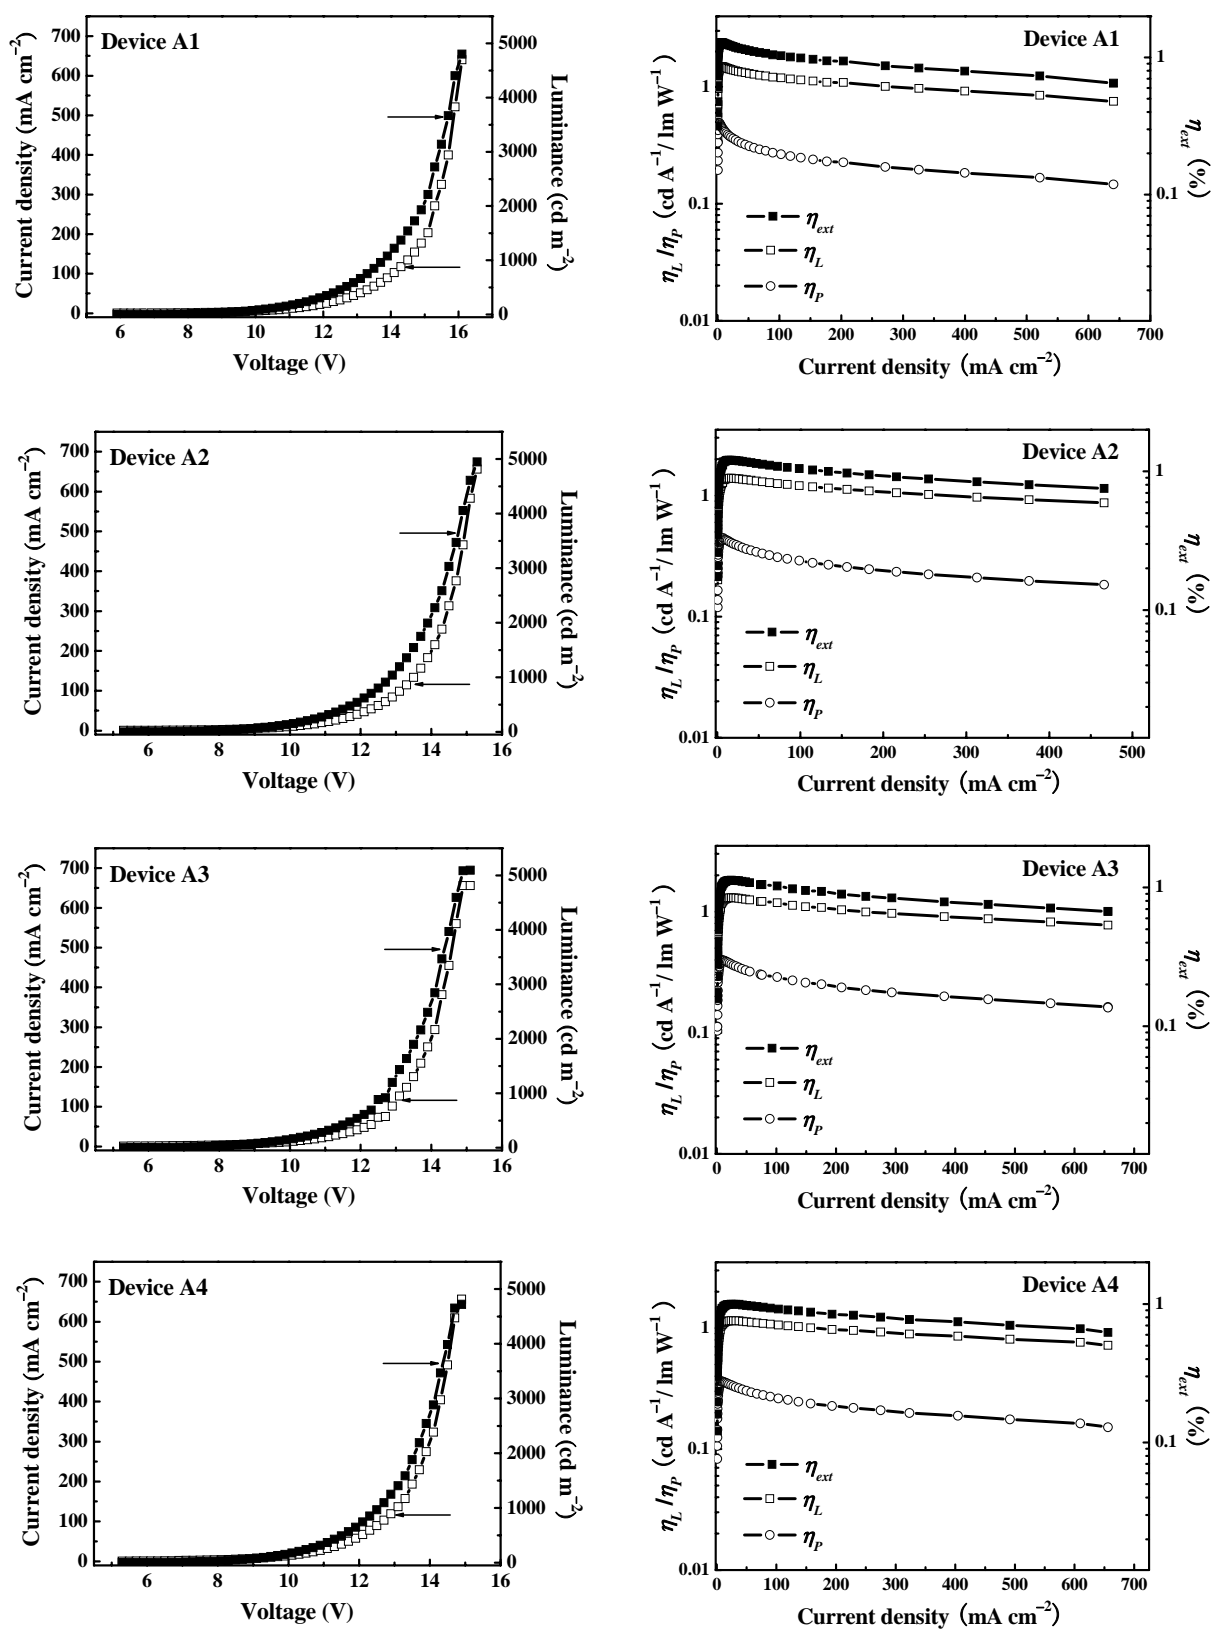

**Fig. S6** The  $J$ - $V$ - $L$  curves and the efficiency versus current density relationship for devices **A1**–**A4**.

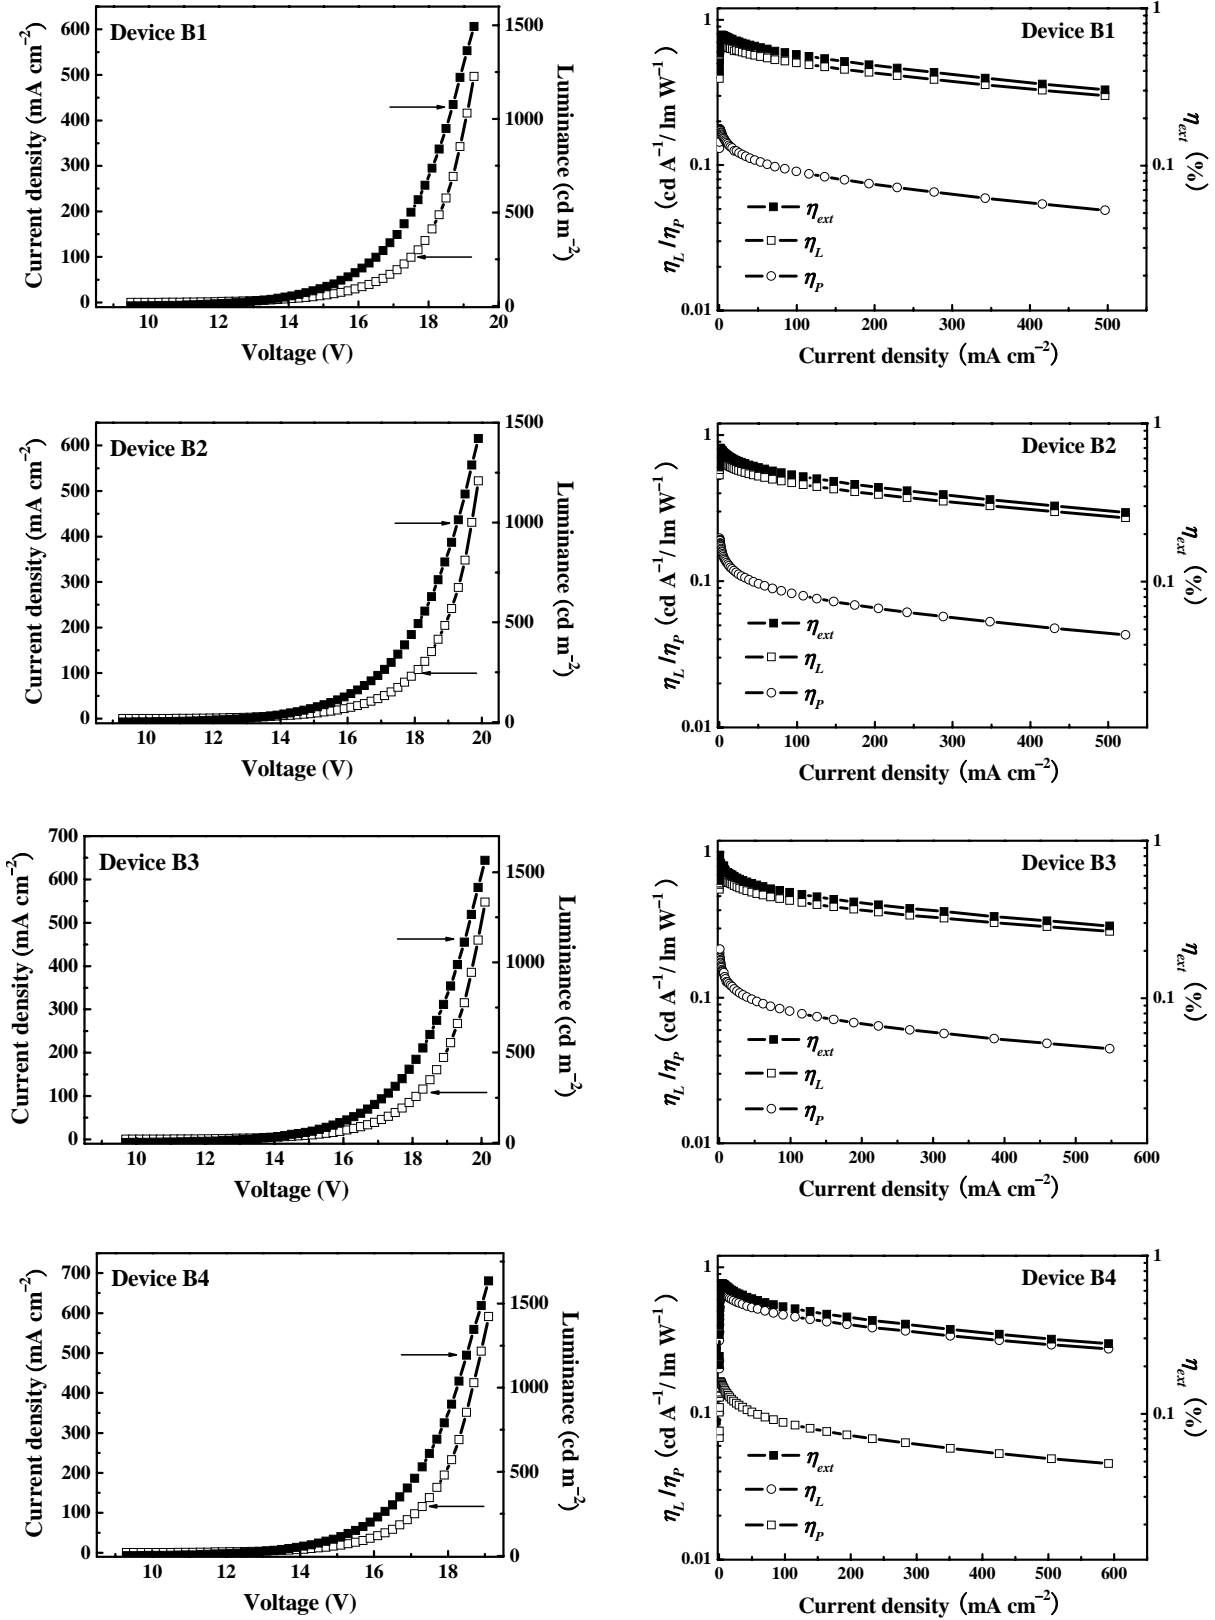

**Fig. S7** The  $J$ - $V$ - $L$  curves and the efficiency versus current density relationship for devices **B1**-**B4**.

**Table S1** Selected bond lengths [Å] and angles [°] for **Ir-1** and **Pt-1**.

| <b>Ir-1</b>          |                            | <b>Pt-1</b>          |                           |
|----------------------|----------------------------|----------------------|---------------------------|
| bond lengths [Å]     | bond angles [°]            | bond lengths [Å]     | bond angles [°]           |
| Ir(1)–C(1) 1.982(5)  | C(1)–Ir(1)–N(1) 80.0(2)    | Pt(1)–C(1) 1.968(5)  | C(1)–Pt(1)–N(1) 81.5(2)   |
| Ir(1)–C(19) 1.985(5) | C(19)–Ir(1)–N(2) 80.5(2)   | Pt(1)–O(2) 2.000(3)  | O(2)–Pt(1)–O(3) 92.0(1)   |
| Ir(1)–O(3) 2.144(4)  | N(1)–Ir(1)–N(2) 172.9(2)   | Pt(1)–O(3) 2.080(3)  | N(1)–Pt(1)–O(2) 175.1(1)  |
| Ir(1)–O(4) 2.145(4)  | O(3)–Ir(1)–O(4) 88.7(2)    | Pt(1)–N(1) 1.982(4)  | C(1)–Pt(1)–O(3) 173.9(2)  |
| Ir(1)–N(1) 2.033(4)  | C(19)–Ir(1)–O(3) 176.8(2)  | C(3)–C(4) 1.486(6)   | O(1)–C(10)–C(11) 128.3(5) |
| Ir(1)–N(2) 2.037(4)  | C(1)–Ir(1)–O(4) 176.0(2)   | C(3)–C(11) 1.398(7)  | O(1)–C(10)–C(9) 126.4(5)  |
| C(3)–C(4) 1.491(8)   | O(1)–C(10)–C(9) 127.6(5)   | C(4)–C(9) 1.396(7)   | C(11)–C(10)–C(9) 105.3(4) |
| C(3)–C(11) 1.398(8)  | O(1)–C(10)–C(11) 127.3(6)  | C(10)–O(1) 1.216(6)  |                           |
| C(4)–C(9) 1.416(8)   | C(9)–C(10)–C(11) 105.1(5)  | C(10)–C(11) 1.484(7) |                           |
| C(10)–O(1) 1.217(7)  | O(2)–C(28)–C(29) 128.8(6)  | C(9)–C(10) 1.502(7)  |                           |
| C(10)–C(11) 1.502(7) | O(2)–C(28)–C(27) 126.3(6)  |                      |                           |
| C(9)–C(10) 1.491(9)  | C(29)–C(28)–C(27) 104.8(5) |                      |                           |
| C(21)–C(22) 1.489(7) |                            |                      |                           |
| C(21)–C(29) 1.395(7) |                            |                      |                           |
| C(22)–C(27) 1.396(8) |                            |                      |                           |
| C(28)–O(2) 1.208(7)  |                            |                      |                           |
| C(28)–C(29) 1.493(8) |                            |                      |                           |
| C(27)–C(28) 1.496(9) |                            |                      |                           |

**Table S2** Selected bond lengths [Å] for the phenyl and pyridyl rings in the ligand groups of the complexes **Ir-1** and **Pt-1**.

| <b>Ir-1</b>          |                      | <b>Pt-1</b>          |
|----------------------|----------------------|----------------------|
| C(1)–C(13) 1.415(7)  | C(19)–C(20) 1.397(7) | C(1)–C(2) 1.400(7)   |
| C(1)–C(2) 1.419(7)   | C(19)–C(31) 1.423(7) | C(1)–C(13) 1.409(7)  |
| C(2)–C(3) 1.375(7)   | C(20)–C(21) 1.369(7) | C(2)–C(3) 1.379(6)   |
| C(3)–C(11) 1.398(8)  | C(21)–C(29) 1.395(7) | C(3)–C(11) 1.398(7)  |
| C(4)–C(5) 1.363(9)   | C(22)–C(23) 1.376(8) | C(4)–C(5) 1.370(7)   |
| C(4)–C(9) 1.416(8)   | C(22)–C(27) 1.396(8) | C(4)–C(9) 1.396(7)   |
| C(5)–C(6) 1.396(9)   | C(23)–C(24) 1.375(8) | C(5)–C(6) 1.389(7)   |
| C(6)–C(7) 1.36(1)    | C(24)–C(25) 1.40(1)  | C(6)–C(7) 1.377(8)   |
| C(7)–C(8) 1.40(1)    | C(25)–C(26) 1.386(9) | C(7)–C(8) 1.380(9)   |
| C(8)–C(9) 1.385(9)   | C(26)–C(27) 1.377(8) | C(8)–C(9) 1.372(7)   |
| C(11)–C(12) 1.381(8) | C(29)–C(30) 1.389(8) | C(11)–C(12) 1.380(7) |
| C(12)–C(13) 1.403(7) | C(30)–C(31) 1.390(7) | C(12)–C(13) 1.395(6) |
| C(14)–N(1) 1.358(6)  | C(32)–N(2) 1.366(7)  | C(14)–N(1) 1.363(6)  |
| C(14)–C(15) 1.392(7) | C(32)–C(33) 1.397(7) | C(14)–C(15) 1.401(7) |
| C(15)–C(16) 1.374(8) | C(33)–C(34) 1.361(9) | C(15)–C(16) 1.350(8) |
| C(16)–C(17) 1.386(9) | C(34)–C(35) 1.37(1)  | C(16)–C(17) 1.390(8) |
| C(17)–C(18) 1.378(8) | C(35)–C(36) 1.399(8) | C(17)–C(18) 1.355(8) |
| C(18)–N(1) 1.347(7)  | C(36)–N(2) 1.340(7)  | C(18)–N(1) 1.346(6)  |



**Table S3** Selected bond lengths [ $\text{\AA}$ ] and angles [ $^\circ$ ] for the complex **Pt-2**.

| <b>Pt-2</b>                   |          |                          |          |
|-------------------------------|----------|--------------------------|----------|
| bond lengths [ $\text{\AA}$ ] |          | bond angles [ $^\circ$ ] |          |
| Pt(1)-C(12)                   | 1.973(3) | C(12)-Pt(1)-N(1)         | 81.5 (1) |
| Pt(1)-O(1)                    | 2.080(2) | C(12)-Pt(1)-O(2)         | 93.2(1)  |
| Pt(1)-O(2)                    | 1.995(3) | N(1)-Pt(1)-O(1)          | 93.5(1)  |
| Pt(1)-N(1)                    | 1.985(3) | O(1)-Pt(1)-O(2)          | 91.9(1)  |
|                               |          | N(1)-Pt(1)-O(2)          | 174.4(1) |
| C(14)-C(15)                   | 1.395(5) | C(12)-Pt(1)-O(1)         | 174.3(1) |
| C(14)-C(17)                   | 1.470(5) |                          |          |
| C(15)-C(23)                   | 1.525(5) | C(15)-C(23)-C(22)        | 101.0(3) |
| C(17)-C(22)                   | 1.395(5) |                          |          |
| C(22)-O(23)                   | 1.517(5) |                          |          |

**Table S4** X-ray crystal data for the complexes.

| Compound                                                                     | <b>Ir-1</b>                                                                                       | <b>Pt-1</b>                                        | <b>Pt-2</b>                                        |
|------------------------------------------------------------------------------|---------------------------------------------------------------------------------------------------|----------------------------------------------------|----------------------------------------------------|
| CCDC no.                                                                     | 698299                                                                                            | 698300                                             | 639792                                             |
| formula                                                                      | C <sub>41</sub> H <sub>27</sub> IrN <sub>2</sub> O <sub>4</sub> ·2CH <sub>2</sub> Cl <sub>2</sub> | C <sub>23</sub> H <sub>17</sub> NO <sub>3</sub> Pt | C <sub>27</sub> H <sub>27</sub> NO <sub>2</sub> Pt |
| formula weight                                                               | 973.70                                                                                            | 550.47                                             | 592.59                                             |
| crystal system                                                               | triclinic                                                                                         | monoclinic                                         | monoclinic                                         |
| space group                                                                  | <i>P</i> $\bar{1}$                                                                                | <i>P</i> 2 <sub>1</sub> / <i>c</i>                 | <i>P</i> 2 <sub>1</sub> / <i>c</i>                 |
| <i>a</i> (Å)                                                                 | 12.2247(18)                                                                                       | 9.6884(7)                                          | 8.1679(5)                                          |
| <i>b</i> (Å)                                                                 | 13.728(2)                                                                                         | 7.8986(6)                                          | 26.7111(15)                                        |
| <i>c</i> (Å)                                                                 | 13.838(2)                                                                                         | 23.7456(18)                                        | 10.9458(6)                                         |
| $\alpha$ (deg)                                                               | 63.248(2)                                                                                         | 90                                                 | 90                                                 |
| $\beta$ (deg)                                                                | 74.128(2)                                                                                         | 95.0830(10)                                        | 107.2510(10)                                       |
| $\gamma$ (deg)                                                               | 74.473(3)                                                                                         | 90                                                 | 90                                                 |
| <i>V</i> (Å <sup>3</sup> )                                                   | 1966.2(5)                                                                                         | 1810.0(2)                                          | 2280.7(2)                                          |
| <i>Z</i>                                                                     | 2                                                                                                 | 4                                                  | 4                                                  |
| <i>D</i> <sub>calcd</sub> (g cm <sup>-3</sup> )                              | 1.645                                                                                             | 2.020                                              | 1.726                                              |
| $\mu$ (mm <sup>-1</sup> )                                                    | 3.712                                                                                             | 7.777                                              | 6,176                                              |
| <i>F</i> (000)                                                               | 960                                                                                               | 1056                                               | 1160                                               |
| $\theta$ range (deg)                                                         | 1.69–28.31                                                                                        | 2.11–25.00                                         | 2.47–28.30                                         |
| reflections collected                                                        | 11580                                                                                             | 8447                                               | 13355                                              |
| unique reflections                                                           | 8501                                                                                              | 3170                                               | 5267                                               |
| <i>R</i> <sub>int</sub>                                                      | 0.0301                                                                                            | 0.0277                                             | 0.0232                                             |
| observed reflections                                                         | 7481                                                                                              | 2909                                               | 4382                                               |
| no. of parameters                                                            | 487                                                                                               | 253                                                | 280                                                |
| <i>R</i> 1, <i>wR</i> 2 [ <i>I</i> > 2.0 $\sigma$ ( <i>I</i> )] <sup>a</sup> | 0.0430, 0.1124                                                                                    | 0.0275, 0.0681                                     | 0.0272, 0.0616                                     |
| <i>R</i> 1, <i>wR</i> 2 (all data)                                           | 0.0498, 0.1176                                                                                    | 0.0304, 0.0694                                     | 0.0309, 0.0628                                     |
| GoF on <i>F</i> <sup>2</sup> <sup>b</sup>                                    | 1.024                                                                                             | 1.082                                              | 1.176                                              |

<sup>a</sup>  $R1 = \sum ||F_o| - |F_c|| / \sum |F_o|$ .  $wR2 = \{\sum [w(F_o^2 - F_c^2)^2] / \sum [w(F_o^2)^2]\}^{1/2}$ .

<sup>b</sup>  $GoF = [(\sum w|F_o| - |F_c|)^2 / (N_{obs} - N_{param})]^{1/2}$ .

**Table S5** Performance of the electrophosphorescent red OLEDs made from **Ir-1** and **Pt-1**.

| Device    | Phosphor dopant        | $V_{\text{turn-on}}$<br>/V | Luminance $L$<br>/cd m <sup>-2</sup> | $\eta_{\text{ext}}$<br>/% | $\eta_{\text{L}}$<br>/cd A <sup>-1</sup> | $\eta_{\text{p}}$<br>/lm W <sup>-1</sup> | $\lambda_{\text{max}}$<br>/nm <sup>d</sup> |
|-----------|------------------------|----------------------------|--------------------------------------|---------------------------|------------------------------------------|------------------------------------------|--------------------------------------------|
| <b>A1</b> | <b>Ir-1</b> (4wt.-%)   | 5.9                        | 4803 (16.1) <sup>a</sup>             | 1.29 (10.5)               | 1.48 (10.5)                              | 0.49 (7.9)                               | 609                                        |
|           |                        |                            | 282 <sup>b</sup>                     | 1.22                      | 1.41                                     | 0.38                                     | (0.63, 0.38)                               |
|           |                        |                            | 1193 <sup>c</sup>                    | 1.03                      | 1.19                                     | 0.27                                     |                                            |
| <b>A2</b> | <b>Ir-1</b> (6 wt.-%)  | 5.3                        | 4944 (15.3)                          | 1.20 (10.7)               | 1.39 (10.7)                              | 0.45 (9.5)                               | 609                                        |
|           |                        |                            | 277                                  | 1.19                      | 1.38                                     | 0.40                                     | (0.63, 0.38)                               |
|           |                        |                            | 1205                                 | 1.04                      | 1.21                                     | 0.29                                     |                                            |
| <b>A3</b> | <b>Ir-1</b> (8 wt.-%)  | 5.3                        | 5096 (15.1)                          | 1.13 (11.1)               | 1.30 (11.1)                              | 0.40 (9.1)                               | 609                                        |
|           |                        |                            | 260                                  | 1.12                      | 1.29                                     | 0.39                                     | (0.63, 0.38)                               |
|           |                        |                            | 1185                                 | 1.03                      | 1.18                                     | 0.29                                     |                                            |
| <b>A4</b> | <b>Ir-1</b> (10 wt.-%) | 5.3                        | 4722 (14.9)                          | 1.00 (10.7)               | 1.15 (10.7)                              | 0.36 (8.9)                               | 609                                        |
|           |                        |                            | 229                                  | 0.99                      | 1.14                                     | 0.34                                     | (0.63, 0.38)                               |
|           |                        |                            | 1064                                 | 0.92                      | 1.06                                     | 0.26                                     |                                            |
| <b>B1</b> | <b>Pt-1</b> (4 wt.-%)  | 9.5                        | 1494 (19.3)                          | 0.68 (12.7)               | 0.67 (12.7)                              | 0.18 (11.1)                              | 611                                        |
|           |                        |                            | 123                                  | 0.62                      | 0.61                                     | 0.13                                     | (0.61, 0.36)                               |
|           |                        |                            | 504                                  | 0.51                      | 0.50                                     | 0.09                                     |                                            |
| <b>B2</b> | <b>Pt-1</b> (6 wt.-%)  | 9.3                        | 1420 (19.9)                          | 0.70 (11.5)               | 0.69 (11.5)                              | 0.20 (9.9)                               | 611                                        |
|           |                        |                            | 117                                  | 0.59                      | 0.59                                     | 0.12                                     | (0.61, 0.36)                               |
|           |                        |                            | 464                                  | 0.47                      | 0.46                                     | 0.08                                     |                                            |
| <b>B3</b> | <b>Pt-1</b> (8 wt.-%)  | 9.7                        | 1566 (20.1)                          | 0.81 (11.7)               | 0.80 (11.7)                              | 0.22 (11.7)                              | 611                                        |
|           |                        |                            | 119                                  | 0.60                      | 0.60                                     | 0.12                                     | (0.62, 0.35)                               |
|           |                        |                            | 466                                  | 0.47                      | 0.47                                     | 0.08                                     |                                            |
| <b>B4</b> | <b>Pt-1</b> (10 wt.-%) | 9.3                        | 1635 (19.1)                          | 0.67 (13.5)               | 0.66 (13.5)                              | 0.16 (11.5)                              | 611                                        |
|           |                        |                            | 120                                  | 0.60                      | 0.60                                     | 0.12                                     | (0.62, 0.35)                               |
|           |                        |                            | 471                                  | 0.47                      | 0.47                                     | 0.09                                     |                                            |

<sup>a</sup> Maximum values of the devices. Values in parentheses are the voltages at which they were obtained. <sup>b</sup> Values collected at 20 mA cm<sup>-2</sup>. <sup>c</sup> Values collected at 100 mA cm<sup>-2</sup>. <sup>d</sup> CIE coordinates [x, y] in parentheses.
